# Supplementary figures and images for: Elevated Inflammation and Poor Diet Quality Associated with Lower eGFR in United States Adults: An NHANES 2015–2018 Analysis
Source: MDPI journal article supplement (doi:10.3390/nu16040528), 2024-02-14

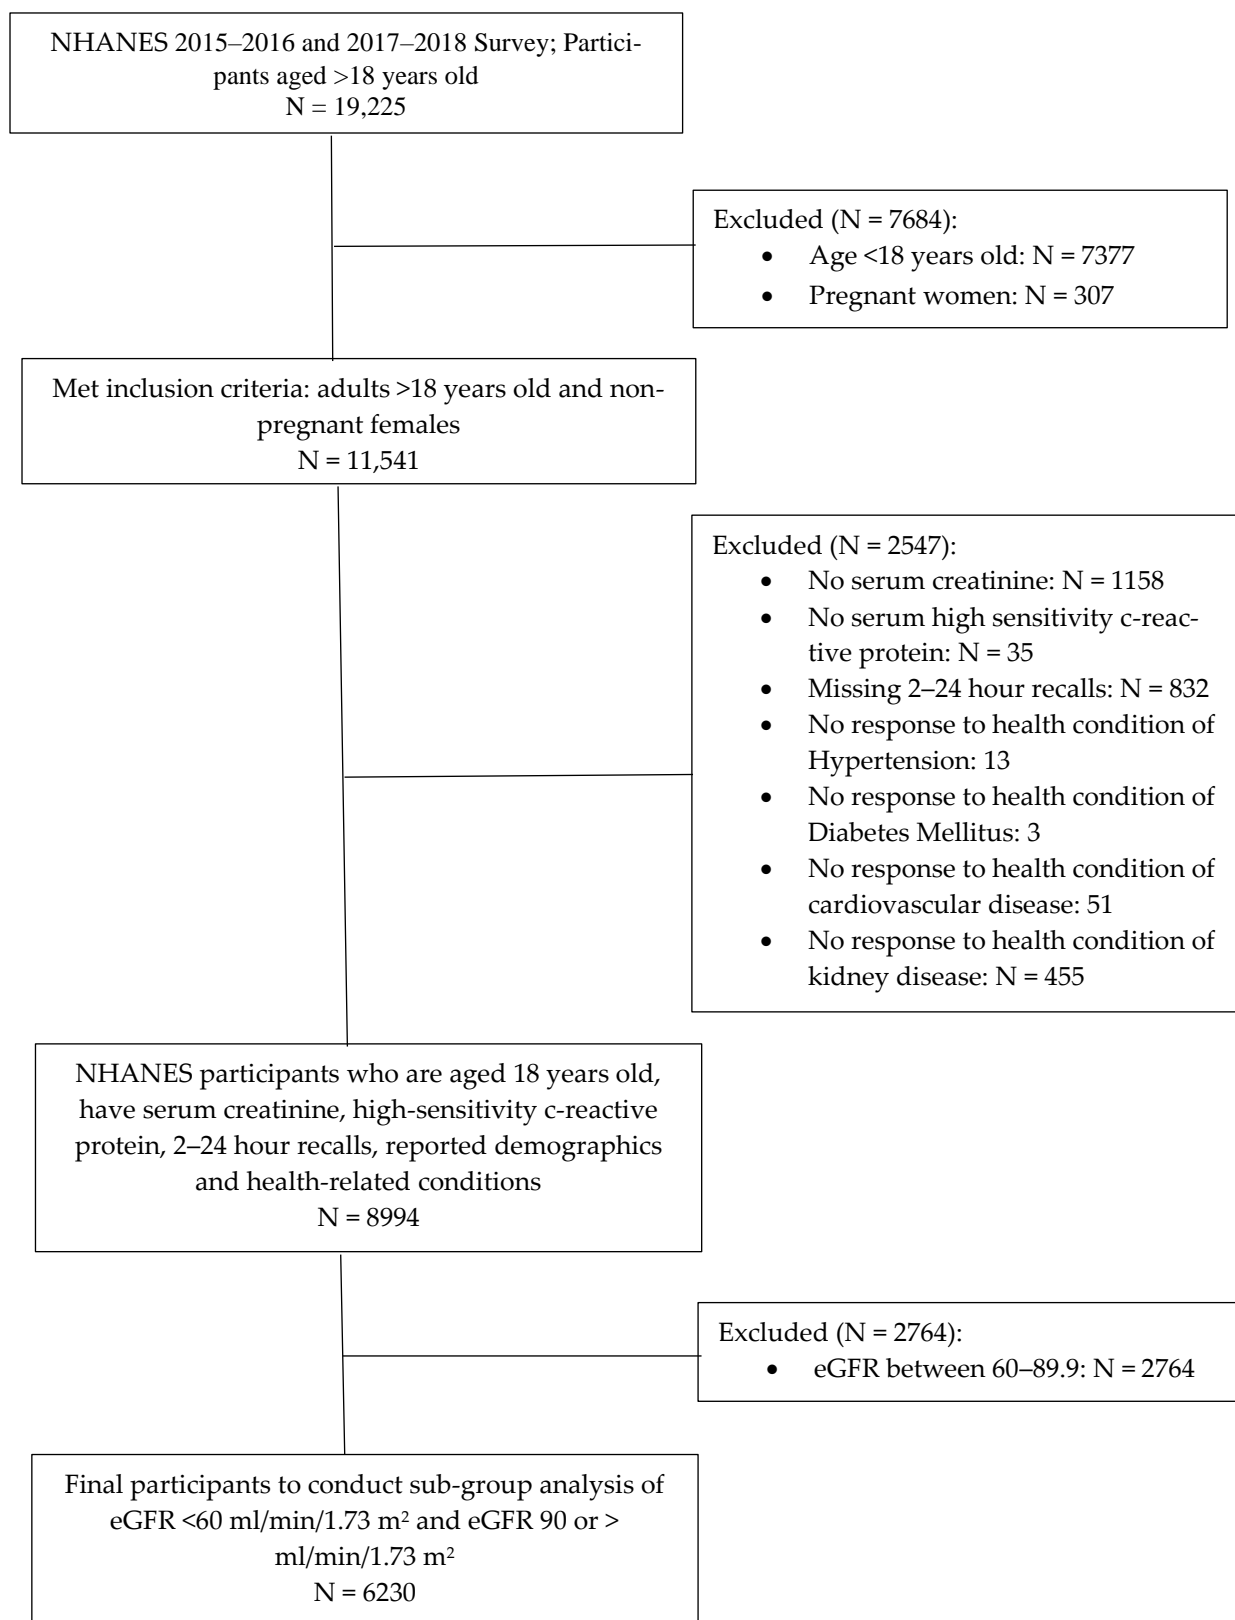

**Figure S1.** Participant Flow Chart

Supplement: s1 [file s1]
